# Supplementary material for: Metabolomics in severe traumatic brain injury: a scoping review
Source: PubMed Central journal article supplement (PMC10577974; doi:10.1186/s12868-023-00824-1), 2023-10-16
Supplement: 12868_2023_824_MOESM1_ESM.pdf [file 12868_2023_824_MOESM1_ESM.pdf]

**Table A1. Summary table of eligible publications exploring metabolomics in severe traumatic brain injury following selection process**

| Year of Study | Sample Type              | Sample Size                                                                                                                                                                                      | Detection Technique | Study setting                                                                                                                                                                  | Refs.                        |
|---------------|--------------------------|--------------------------------------------------------------------------------------------------------------------------------------------------------------------------------------------------|---------------------|--------------------------------------------------------------------------------------------------------------------------------------------------------------------------------|------------------------------|
| (2006)        | MRI                      | TBI patients=10, normal controls=10                                                                                                                                                              | <sup>1</sup> H-MRSI | <sup>1</sup> H-MRSI examinations on patients to determine metabolite levels of N-acetyl aspartate, choline, creatine, and lactate post TBI                                     | Marino et al. (25)           |
| (2011)        | Serum/Plasma             | sTBI patients=19, healthy controls=44                                                                                                                                                            | HPLC                | Measured the effects of changes in branched-chain amino acids and plasma aromatic amino acid levels                                                                            | Vuille-Dit-Bille et al. (35) |
| (2012)        | Serum/Plasma             | sTBI patients=20, mTBI patients=18, Orthopedic injury patients=15, Healthy volunteer=20                                                                                                          | LC-MS/GC-MS         | Measured plasma levels of L-arginine and similar key metabolic products in patients post TBI and compared them to healthy volunteers and orthopedic controls                   | Jeter et al. (26)            |
| (2013)        | Serum/Plasma             | sTBI patients=20, mTBI patients=18, Orthopedic Injury=15, Healthy volunteer=20                                                                                                                   | LC-MS/GC-MS         | Identified altered metabolic cascades and branched-chain amino acids in acute sTBI and mTBI patients                                                                           | Jeter et al. (27)            |
| (2013)        | CSF                      | TBI patients (moTBI or sTBI only, 14 yrs or older)=44, non-injured controls=13                                                                                                                   | <sup>1</sup> H-NMR  | Analyzed metabolites from the CSF of patients following TBI                                                                                                                    | Glenn et al. (37)            |
| (2015)        | CSF                      | sTBI patients=28, CSF control patients=11, serum control patients=20                                                                                                                             | HPLC/GC-MS          | Investigated the effect of the kynurenine pathway on brain damage post TBI                                                                                                     | Yan et al. (62)              |
| (2016)        | Serum/Plasma             | sTBI patients=20, mTBI patients=20, healthy volunteers=20 (ages ranged from 14 to 57)                                                                                                            | LC-MS/GC-MS         | Specifically examined methionine alteration and related metabolites following TBI                                                                                              | Dash et al. (29)             |
| (2016)        | Serum/<br>Microdialysate | TBI patients=144 (mTBI=108, moTBI=14, sTBI=22), acute orthopedic non-brain injury controls=28, validation study=67 TBI (mTBI=37, moTBI=7, sTBI=22, acute orthopedic non-brain injury controls=27 | GCxGC-TOFMS         | Aimed to determine markers and outcome prediction for TBI patients by evaluating two independent cohorts using metabolic profiling. Combined results with clinical and CT data | Oresic et al. (33)           |

|        |                                 |                                                                                                                                                            |                                |                                                                                                                                               |                      |
|--------|---------------------------------|------------------------------------------------------------------------------------------------------------------------------------------------------------|--------------------------------|-----------------------------------------------------------------------------------------------------------------------------------------------|----------------------|
| (2016) | Microdialysate                  | sTBI patients=30, non-TBI neurosurgical patients =6                                                                                                        | HPLC                           | Analyzed the behaviour of extracellular NAA levels post sTBI                                                                                  | Shannon et al. (28)  |
| (2017) | CSF                             | sTBI patients=20 (divided into non-survival=6 & survival=14), healthy controls=20                                                                          | HPLC                           | Assessed levels of glutamate, lactate, BDNF, and GDNF in sTBI patients between 2 and 4 h post injury to determine biomarker potential         | Stefani et al. (38)  |
| (2018) | Serum/Plasma/<br>Microdialysate | TBI patients=144 (sTBI patients=22, moTBI patients=14, mTBI patients=108), orthopedic injury controls=55, validation cohort=66 (sTBI=23, moTBI=7, mTBI=36) | GCxGC-TOFMS/GC xGC-MS          | Explored if metabolites could validate the need for CT scans in TBI patients as well as predict the nature of brain injury                    | Dickens et al. (36)  |
| (2019) | Serum/Plasma                    | sTBI patients=26, healthy controls=6                                                                                                                       | LC-MS                          | Compared metabolite levels in arterial and jugular venous samples to determine changes post sTBI and study the effects on cerebral metabolism | Wolahan et al. (34)  |
| (2019) | Microdialysate                  | TBI patients=26, validation cohort=12                                                                                                                      | LC-MS                          | Combined clinical and cerebral microdialysis metabolomics data to investigate metabolites and associations with patient outcomes              | Eiden et al. (63)    |
| (2020) | Serum/Plasma                    | TBI patients=96 (mTBI=79, moTBI=10 sTBI=7)                                                                                                                 | GCxGC-TOFMS                    | Related circulating metabolites to findings from structural MRI post TBI                                                                      | Thomas et al. (64)   |
| (2020) | Serum/Plasma                    | TBI patients=29 (sTBI=12, moTBI=8, mTBI=9), control patients=10                                                                                            | HPLC with UV-visible detection | Investigated the therapeutic potential of spermidine in TBI in humans and mouse models                                                        | Huang et al. (65)    |
| (2021) | MRI                             | sTBI patients=10                                                                                                                                           | <sup>31</sup> P-MRS            | Tested the diagnostic potential of <sup>31</sup> P-MRS to detect cerebral energy metabolism changes post TBI                                  | Pinggera et al. (66) |
| (2021) | MRI                             | sTBI patients=26, control patients=20                                                                                                                      | <sup>31</sup> P-MRS            | Performed <sup>31</sup> P-MRS post TBI at two separate time intervals to detect alterations in cerebral energy metabolism                     | Pinggera et al. (67) |
| (2021) | Urine                           | TBI patients=8 (sTBI=2, moTBI=3, mTBI=3), no controls,                                                                                                     | <sup>1</sup> H-NMR             | Analyzed urine samples in TBI patients to determine if metabolites changed during                                                             | Bykowski et al. (30) |

|        |              |                                                                                                                                                                                                   |                     |                                                                                                                                                                           |                      |
|--------|--------------|---------------------------------------------------------------------------------------------------------------------------------------------------------------------------------------------------|---------------------|---------------------------------------------------------------------------------------------------------------------------------------------------------------------------|----------------------|
|        |              | but incorporated a within-subject control design                                                                                                                                                  |                     | recovery, correlated to injury severity, and reflected TBI mechanisms                                                                                                     |                      |
| (2022) | Serum/Plasma | TBI patients (sTBI and moTBI only)=51                                                                                                                                                             | LC-MS               | Investigation of serum glycome patterns following TBI to determine glyco-biomarker signatures and clinical relevance                                                      | Mondello et al. (31) |
| (2022) | Serum/Plasma | TBI patients=716, non-TBI patients=229 (orthopedic controls=40, internal medicine=96, other neurological patients=93). Samples collected from the Center-TBI, validation dataset=558 TBI patients | GC-QTOFMS/LC-QTOFMS | Intended to define and describe the metabolome related to acute TBI and investigate its effect on severity and patient outcome post TBI using metabolomics and lipidomics | Thomas et al. (32)   |

*Note.* Abbreviations: <sup>1</sup>H-MRSI, proton nuclear magnetic resonance imaging; <sup>31</sup>P-MRS, phosphorous magnetic resonance spectroscopy; BDNF, brain-derived neurotrophic factor; CSF, cerebrospinal fluid; CT, computed tomography; GC-MS, gas chromatography-mass spectroscopy; GC-QTOFMS, gas chromatography coupled to quadrupole time-of-flight mass spectrometry; GCxGC-MS, 2D gas chromatography coupled to mass spectrometry; GCxGC-TOFMS, 2D gas chromatography coupled to time-of-flight mass spectrometry; GDNF, glial cell-derived neurotrophic factor; <sup>1</sup>H-NMR, proton nuclear magnetic resonance; HPLC, high performance liquid chromatography; LC-MS, liquid chromatography-mass spectrometry; LC-QTOFMS, liquid chromatography coupled to quadrupole time-of-flight mass spectrometry; moTBI, moderate traumatic brain injury; MRI, magnetic resonance imaging; mTBI, minor traumatic brain injury; NAA, acetylaspartate; sTBI, severe traumatic brain injury; TBI, traumatic brain injury; UV, ultraviolet.
